# Supplementary material
Source: Springer Nature journal article supplement (https://www.springermedizin.de/resource/supplementary/12874_2011_619_MOESM2_ESM.pdf/9432248)

Cumulative Survival

1.00  
0.50

— Baseline health status rated as 'good' or 'very good'  
- - - Baseline health status rated as 'fair', 'poor', or 'very poor'

Survival Time in Months

0 20 40 60 80 100

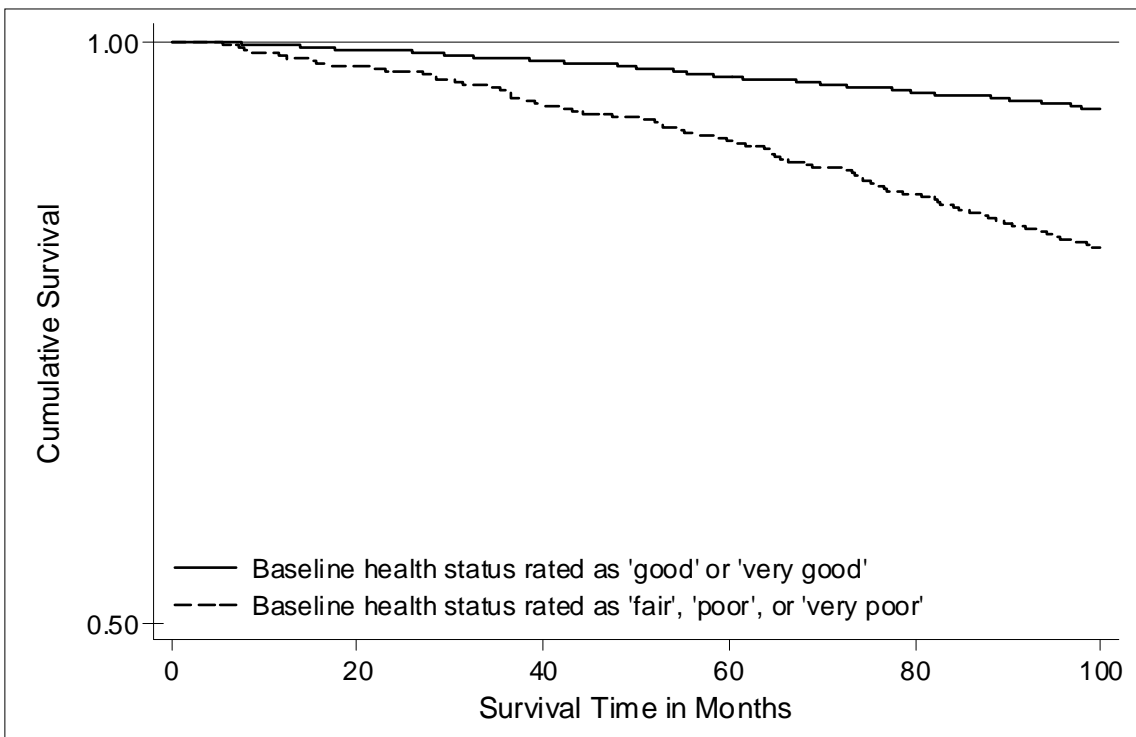

Supplement: MOESM2 [file 9432248]
